# Supplementary material
Source: publisher figshare collection journal article supplement (https://acs.figshare.com/ndownloader/files/10669696)
Supplement: Supplementary file 1 [file 10669696]

Supporting Information:

**Rationally Designed, Multifunctional Self-Assembled  
Nanoparticles for Covalently Networked, Flexible and Self-  
Healable Superhydrophobic Composite Films**

Yujin Lee,<sup>a</sup> Eun-Ah You,<sup>\*b</sup> and Young-Geun Ha<sup>\*a</sup>

a. Department of Chemistry, Kyonggi University, Suwon, Gyeonggi-Do, 16227, Republic of Korea.

b. Center for Nano-Bio Measurement, Korea Research Institute of Standards and Science, Daejeon, 34113, Republic of Korea.

\*Corresponding authors, [eayou@kriss.re.kr](mailto:eayou@kriss.re.kr); [ygha@kgu.ac.kr](mailto:ygha@kgu.ac.kr)

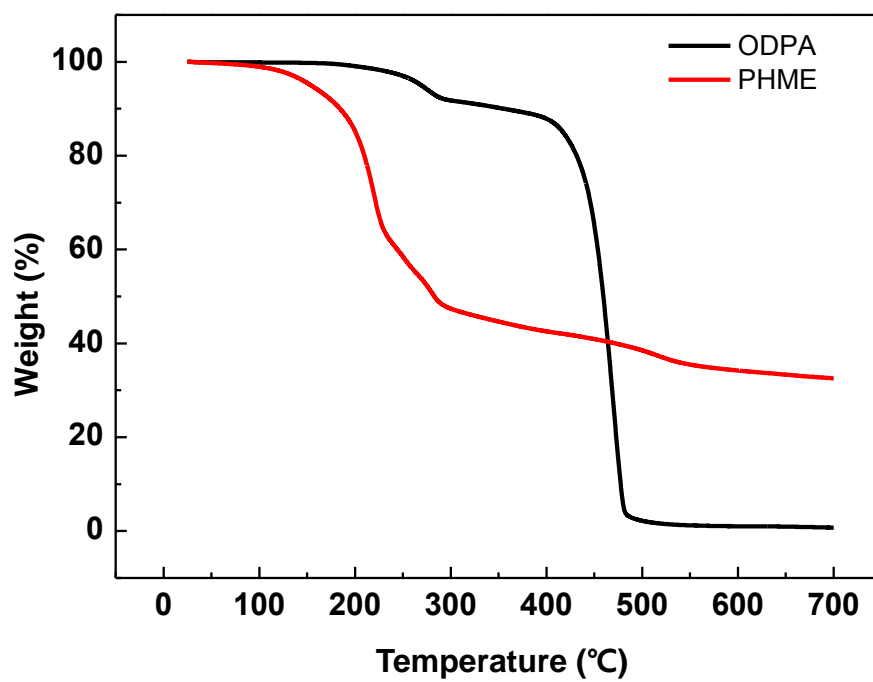

**Figure S1.** TGA data of ODPA and PHME molecules.

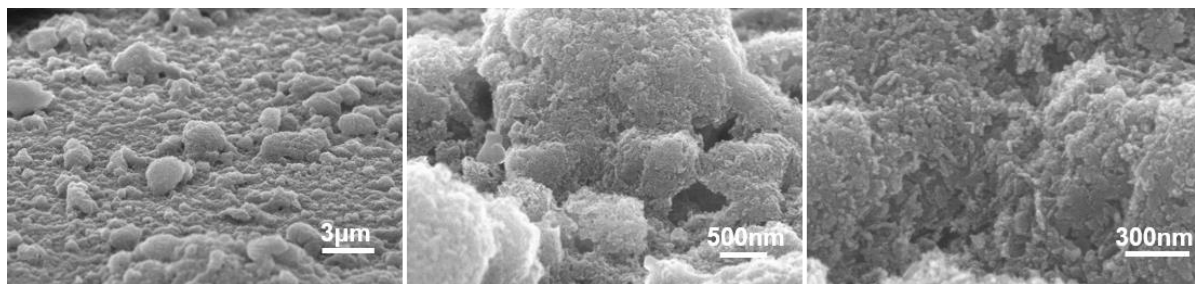

**Figure S2.** Tilted SEM images of the superhydrophobic composite film of multifunctional NPs with a representative SAM ratio of ODPA to PHME (7:3) in different magnifications. The tilted views at varied magnifications show the micro-sized papilla-like features formed from NPs, representing hierarchical micro/nano dual-scale structures. The samples were tilted at 15°.

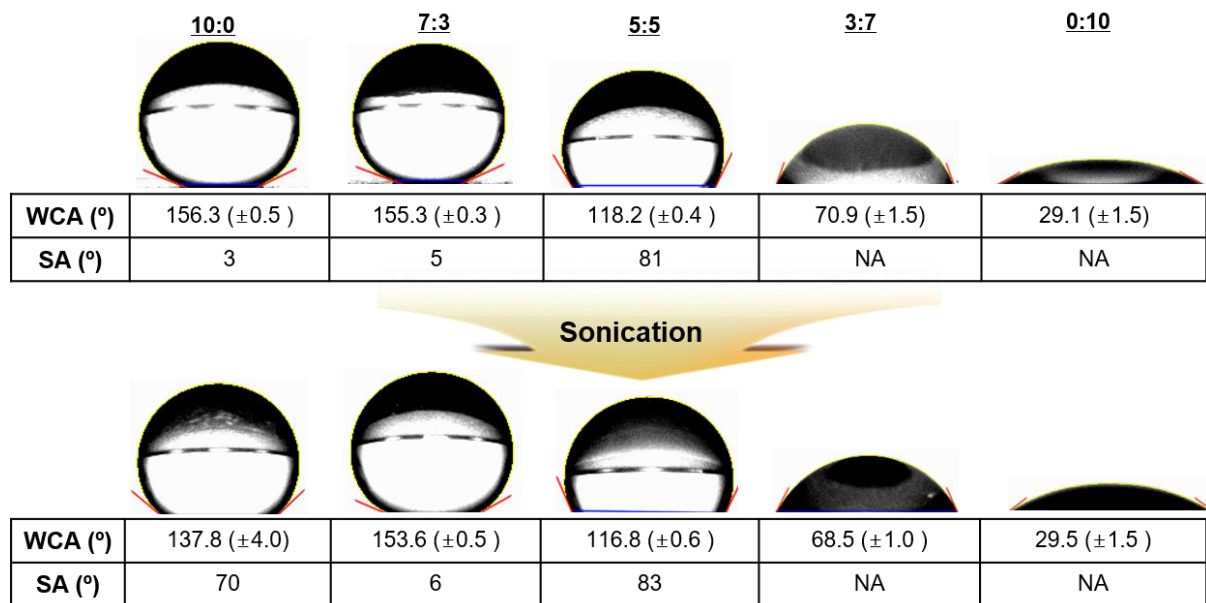

**Figure S3.** Contact angles and sliding angles of water droplets on the composite films of multifunctional NPs with various ratios of ODPA to PHME SAMs before and after ultrasonication treatment.

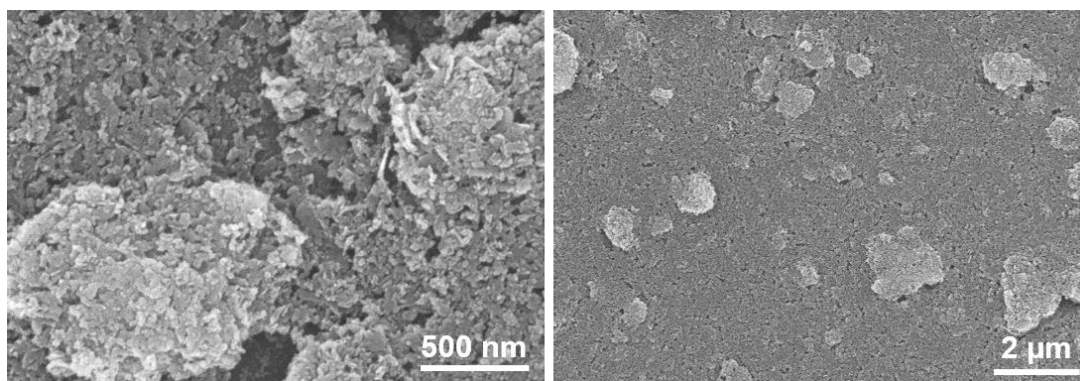

**Figure S4.** Top-down SEM images of the composite film of multifunctional NPs with an optimized SAM ratio of 7:3 after repeatedly bending 100 times. The SEM images, taken at different magnifications, show that the hierarchical micro/nano dual-scale surface roughness can be retained after the repeated bending process.

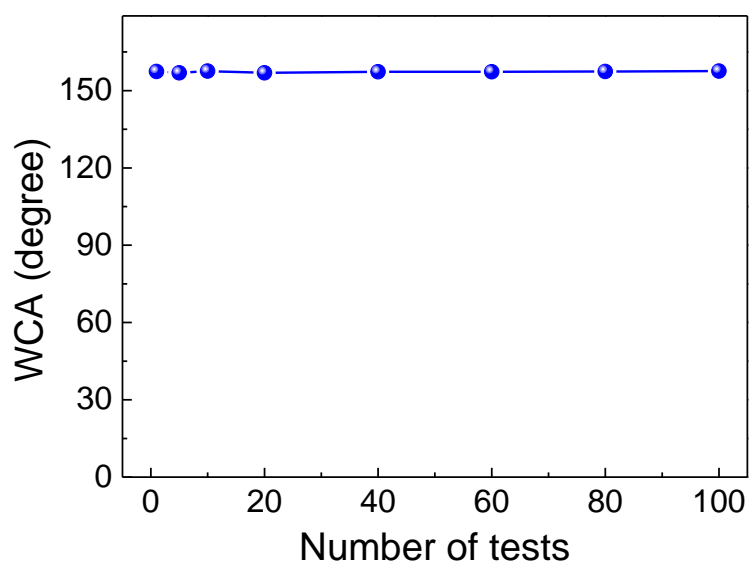

**Figure S5.** WCA of the hybrid composite film of multifunctional NPs with the SAM ratio of ODPA to PHME of 10:0 as a function of the number of bending tests for 100 cycles under a bending stress at the bending radius of 6.5 mm.

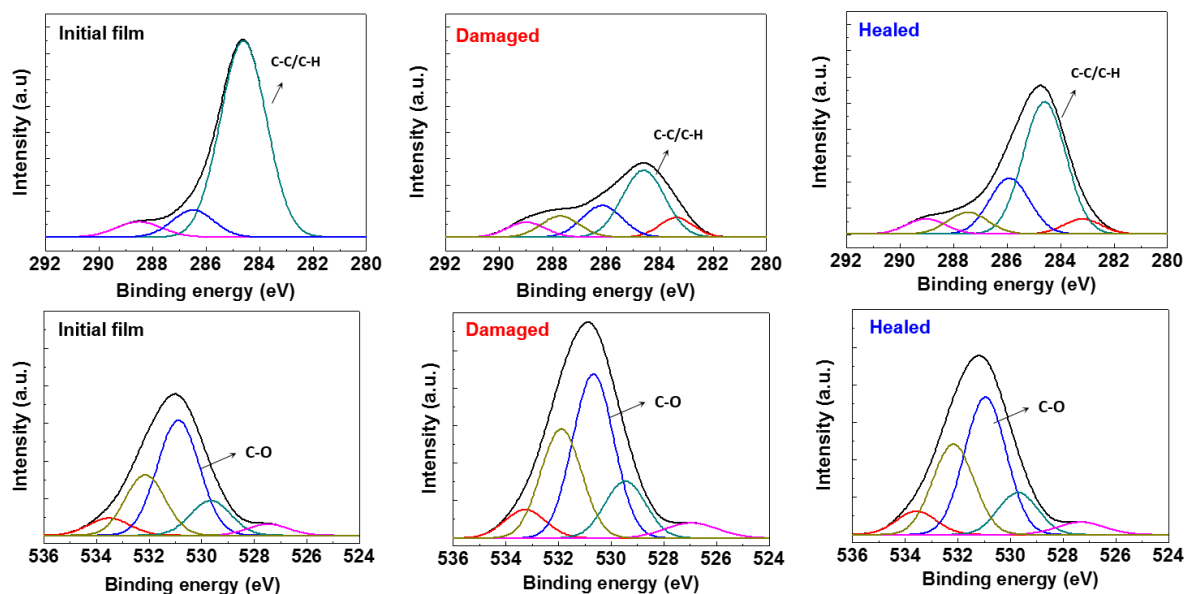

**Figure S6.** XPS spectra of the multifunctional NP-based superhydrophobic composite film (7:3) after UVO damage and subsequent self-healing. The composite film was treated with UVO (2 min) to induce chemical damage and then with heat (100 °C, 30 min) to recover. After the heating process, the respective C-C/C-H and C-O peaks of the damaged film were restored to the initial superhydrophobic state.

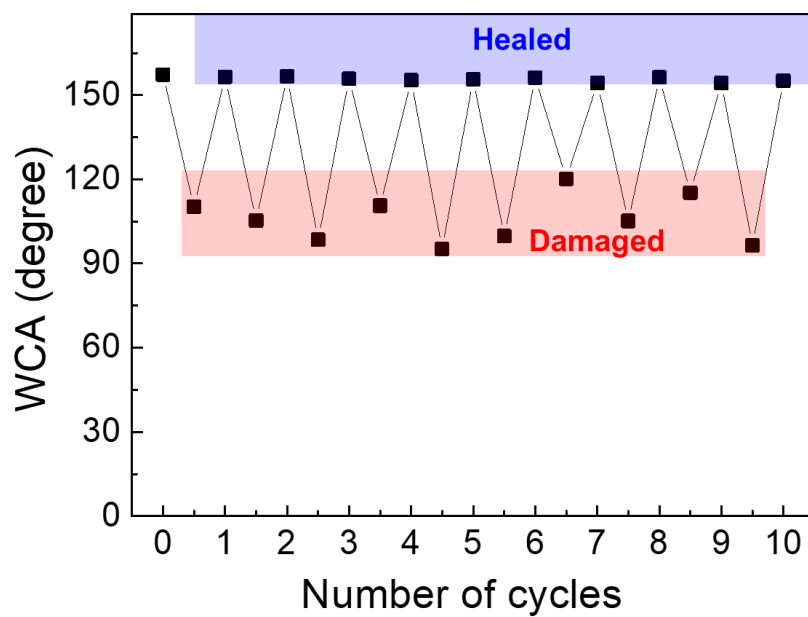

**Figure S7.** Change in WCAs of the hybrid composite film of multifunctional NPs with the SAM ratio of ODPA to PHME of 10:0 for 10 cycles of damage by immersion in a strong acid solution (6M HCl) and healing by heating.



**Table S1.** Comparison of the self-healing performance of the multifunctional NP-based superhydrophobic composite film with other self-healable superhydrophobic composite films.

| Coating materials                              | Damage source         | Initial WCA (°) | Damaged WCA (°) | Healed WCA (°) | # of cycles | Reference  |
|------------------------------------------------|-----------------------|-----------------|-----------------|----------------|-------------|------------|
| Multifunctional NPs/HDDA                       | UV Ozone              | >150            | ~ 0             | >150           | 10          | This study |
|                                                | HCl (6M)              | >150            | 93-107          | >150           | 10          |            |
| PDA/PDMS                                       | O <sub>2</sub> Plasma | >160            | ~ 50            | >160           | 8           | [63]       |
| SPEEK/POTS                                     | O <sub>2</sub> Plasma | >150            | ~ 0             | >150           | 6           | [64]       |
| PAA/PAH-SPEEK                                  | O <sub>2</sub> Plasma | >160            | ~ 0             | >160           | 9           | [65]       |
| PS/SiO <sub>2</sub> NPs with PDMS              | O <sub>2</sub> Plasma | >150            | ~ 0             | >150           | 9           | [66]       |
| PDA@ODA-Fe <sub>3</sub> O <sub>4</sub>         | O <sub>2</sub> Plasma | >150            | ~ 0             | >150           | 10          | [67]       |
| PAL@fluoroPOS/PFD TES                          | O <sub>2</sub> Plasma | >150            | ~ 0             | >150           | 5           | [68]       |
| DOPA-silica trimethylsilyl modified (DSTM) gel | HCl (1M)              | >150            | ~ 127           | >150           | 8           | [69]       |
| F-POSS/APP/bPEI                                | O <sub>2</sub> Plasma | >160            | ~ 0             | >160           | 9           | [70]       |
